# Supplementary material
Source: publisher figshare collection journal article supplement (https://karger.figshare.com/ndownloader/files/25818746)
Supplement: Supplementary file 1 [file 25818746]

| **Rank** | **Paper** | **Number of citations (meanª)** | | | | | |
| --- | --- | --- | --- | --- | --- | --- | --- |
| **Web of Science All Databases** | **Web of Science Core Collection** | **Web of Science Last five years** | **Web of Science Last six months** | **Google Scholar** | **Scopus** |
| **1** | Loesche WJ. Role of Streptococcus mutans in human dental decay. Microbiol Rev. 1986; 50(4):353-380. | 1961 (61.28) | 1879  (58.72) | 126 | 7 | 3426  (107.06) | 1960  (61.25) |
| **2** | Hamada S, Slade HD. Biology, immunology, and cariogenicity of Streptococcus mutans. Microbiol Mol Biol Rev. 1980; 44(2):331-384. | 1394 (36.68) | 1358  (35.74) | 58 | 3 | 2201  (57.92) | 1199  (31.55) |
| **3** | Ajdić D, McShan WM, McLaughlin RE, Savić G, Chang J, Carson, MB, et al. Genome sequence of Streptococcus mutans UA159, a cariogenic dental pathogen. Proc Nati Acad Sci. 2002; 99(22):14434-14439. | 1096 (68.50) | 613  (38.31) | 89 | 4 | 928  (58.00) | 646  (40.38) |
| **4** | Selwitz RH, Ismail AI, Pitts NB. Dental caries. Lancet. 2007; 369(9555):51-59. | 816  (74.18) | 768  (69.82) | 379 | 30 | 1851  (168.27) | 930  (84.55) |
| **5** | Gorelick L, Geiger AM, Gwinnett AJ. Incidence of white spot formation after bonding and banding. Am J Orthod. 1982; 81(2):93-98. | 536  (14.89) | 495  (13.75) | 30 | 3 | 1184  (32.89) | 535  (14.86) |
| **6** | Ismail AI, Sohn W, Tellez M, Amaya A, Sen A, Hasson H, et al. The International Caries Detection and Assessment System (ICDAS): an integrated system for measuring dental caries. Community Dent Oral Epidemiol. 2007;35(3):170-178. | 450  (40.91) | 414  (37.64) | 74 | 8 | 849  (77.18) | 483  (43.91) |
| **7** | Featherstone JDB. The science and practice of caries prevention. J Am Dent Assoc. 2000; 131(7):887-899. | 420  (23.33) | 401  (22.28) | 137 | 4 | 1104  (61.33) | 481  (26.72) |
| **8** | Axelsson P, Lindhe J. Effect of controlled oral hygiene procedures on caries and periodontal disease in adults. J Clin Periodontol. 1978;5(2):133-151. | 408  (10.20) | 403  (10.08) | 28 | 2 | 753  (18.83) | 340  (8.50) |
| **9** | Featherstone JDB. Prevention and reversal of dental caries: role of low level fluoride. Community Dent Oral Epidemiol. 1999; 27(1):31-40. | 400  (21.05) | 382  (20.11) | 111 | 1 | 965  (50.79) | 472  (24.84) |
| **10** | Terleckyj B, Willett NP, Shockman GD. Growth of several cariogenic strains of oral streptococci in a chemically defined medium. Infect Immun. 1975; 11(4):649-655. | 399  (9.28) | 399  (9.28) | 3 | 0 | 422  (9.81) | 229  (5.33) |
| **11** | Marthaler TM. Changes in dental caries 1953–2003. Caries Res. 2004; 38(3):173-181. | 387  (27.64) | 361  (25.79) | 29 | 5 | 846  (60.43) | 406  (29.00) |
| **12** | Becker MR, Paster BJ, Leys EJ, Moeschberger ML, Kenyon SG, Galvin JL, et al. Molecular analysis of bacterial species associated with childhood caries. J Clin Microbiol. 2002; 40(3):1001-1009. | 383  (23.94) | 359  (22.44) | 48 | 0 | 691  (43.19) | 401  (25.06) |
| **13** | Axelsson P, Nyström B, Lindhe J. The long‐term effect of a plaque control program on tooth mortality, caries and periodontal disease in adults: results after 30 years of maintenance. J Clin Periodontol. 2004; 31(9):749-757. | 378  (27.00) | 361  (25.79) | 97 | 2 | 798  (57.00) | 408  (29.14) |
| **14** | Van Houte J. Role of micro-organisms in caries etiology. J Dent Res. 1994; 73(3):672-681. | 353  (14.71) | 340  (14.17) | 37 | 2 | 789  (32.88) | 391  (16.29) |
| **15** | Takahashi N, Nyvad B. The role of bacteria in the caries process: ecological perspectives. J Dent Res. 2011; 90(3):294-303. | 352  (50.29) | 329  (47.00) | 145 | 17 | 606  (86.57) | 391  (55.86) |
| **16** | Ten Cate JM, Duijsters PPE. Alternating demineralization and remineralization of artificial enamel lesions. Caries Res. 1982; 16(3):201-210. | 352  (9.78) | 340  (9.44) | 30 | 0 | 536  (14,89) | 345  (9,58) |
| **17** | Tjäderhane L, Larjava H, Sorsa T, Uitto VJ, Larmas M, Salo T. The activation and function of host matrix metalloproteinases in dentin matrix breakdown in caries lesions. J Dent Res. 1988; 77(8):1622-1629. | 345  (17.25) | 323  (16.15) | 25 | 3 | 560  (28.00) | 354  (17.70) |
| **18** | Wiegand A, Buchalla W, Attin T. Review on fluoride-releasing restorative materials—fluoride release and uptake characteristics, antibacterial activity and influence on caries formation. Dent Mater. 2007;23(3):343-362. | 340  (30.91) | 318  (28.91) | 109 | 4 | 655  (59.55) | 373  (33.91) |
| **19** | Featherstone JDB, Ten Cate JM, Shariati M, Arends J. Comparison of artificial caries-like lesions by quantitative microradiography and microhardness profiles. Caries Res. 1983; 17(5):385-391. | 335  (9.57) | 315  (9.00) | 15 | 0 | 550  (15.71) | 333  (9.51) |
| **20** | Aas JA, Griffen AL, Dardis SR, Lee AM, Olsen I, Dewhirst FE, et al. Bacteria of dental caries in primary and permanent teeth in children and young adults. J Clin Microbiol. 2008; 46(4):1407-1417. | 321  (32.10) | 292  (29.20) | 57 | 7 | 599  (59.90) | 330  (33.00) |
| **21** | Bratthall D, Hänsel‐Petersson G, Sundberg H. Reasons for the caries decline: what do the experts believe?. Eur J Oral Sci. 1996; 104(4):416-422. | 321  (14.59) | 298  (13.55) | 31 | 1 | 740  (33.64) | 373  (16.95) |
| **22** | Bowen WH, Koo H. Biology of Streptococcus mutans-derived glucosyltransferases: role in extracellular matrix formation of cariogenic biofilms. Caries Res. 2011; 45(1):69-86. | 311  (44.43) | 300  (42.86) | 89 | 4 | 490  (70.00) | 332  (47.43) |
| **23** | O'Reilly MM, Featherstone JDB. Demineralization and remineralization around orthodontic appliances: an in vivo study. Am J Orthod Dentofacial Orthop. 1987; 92(1):33-40. | 307  (9.90) | 296  (9.55) | 24 | 1 | 679  (21.90) | 330  (10.65) |
| **24** | Bagramian RA, Garcia-Godoy F, Volpe AR. The global increase in dental caries. A pending public health crisis. Am J Dent. 2009; 22(1):3-8. | 304  (33.78) | 295  (32.78) | 62 | 1 | 648  (72.00) | 341  (37.89) |
| **25** | Ogaard B, Rolla G, Arends J. Orthodontic appliances and enamel demineralization: Part 1. Lesion development.  Am J Orthod Dentofacial Orthop. 1988; 94(1):68-73. | 298  (9.93) | 288  (9.60) | 2 | 2 | 620  (20.67) | 310  (10.33) |
| **26** | Yamashita Y, Yamashita Y, Bowen WH, Burne RA, Kuramitsu HK. Role of the Streptococcus mutans gtf genes in caries induction in the specific-pathogen-free rat model. Infect Immun. 1993; 61(9):3811-3817. | 297  (11.88) | 285  (11.40) | 17 | 1 | 385  (15.40) | 296  (11.84) |
| **27** | Axelsson P, Lindhe J. Effect of controlled oral hygiene procedures on caries and periodontal disease in adults: results after 6 years. J Clin Periodontol. 1981;8(3):239-248. | 296  (8.00) | 293  (7.92) | 20 | 1 | 607  (16.41) | 282  (7.62) |
| **28** | Gibbons RJ, Berman KS, Knoettner P, Kapsimalis B. Dental caries and alveolar bone loss in gnotobiotic rats infected with capsule forming streptococci of human origin. Arch Oral Biol. 1966; 11(6):549-560. | 296  (5.69) | 295  (5.67) | 4 | 1 | 400  (7.69) | 159  (3.06) |
| **29** | Reynolds EC. Remineralization of enamel subsurface lesions by casein phosphopeptide-stabilized calcium phosphate solutions. J Dent Res. 1977; 76(9):1587-1595. | 294  (14.00) | 270  (12.86) | 52 | 4 | 641  (30.52) | 329  (15.67) |
| **30** | Näse L, Hatakka K, Savilaht, E, Saxelin M, Pönkä A, Poussa T, et al. Effect of long–term consumption of a probiotic bacterium, Lactobacillus rhamnosus GG, in milk on dental caries and caries risk in children. Caries Res. 2001; 35(6):412-420. | 285  (16.76) | 267  (15.71) | 58 | 2 | 582  (34.24) | 310  (18.24) |
| **31** | Krasse B. Human streptococci and experimental caries in hamsters. Arch Oral Biol. 1966; 11(4):429-436. | 282  (5.42) | 282  (5.42) | 3 | 0 | 365  (7.02) | 184  (6.33) |
| **32** | Marthaler TM, Brunelle J, Downer MC, König KG, Truin GJ, Künzel W, et al. The prevalence of dental caries in Europe 1990-1995. Caries Res. 1966; 30(4):237-255. | 276  (12.55) | 260  (11.82) | 33 | 1 | 685  (31.14) | 330  (15.00) |
| **33** | Mcdonagh MS, Whiting PF, Wilson PM, Sutton AJ, Chestnutt I, Cooper J,W et al. Systematic review of water fluoridation. BMJ. 2000; 321(7265):855-859. | 274  (15.22) | 254  (14.11) | 152 | 5 | 602  (33.44) | 297  (16.50) |
| **34** | Lussi A, Imwinkelried S, Pitts NB, Longbottom C, Reich E. Performance and reproducibility of a laser fluorescence system for detection of occlusal caries in vitro. Caries Res. 1999; 33(4):261-266. | 273  (14.37) | 262  (13.79) | 17 | 1 | 533  (28.05) | 306  (16.11) |
| **35** | Kaste LM, Selwitz RH, Oldakowski RJ, Brunelle JA, Winn DM, Brown LJ. Coronal caries in the primary and permanent dentition of children and adolescents 1–17 years of age: United States, 1988–1991. J Dent Res. 1996; 75(2):631-641. | 271  (12.32) | 266  (12.09) | 36 | 0 | 601  (27.32) | 322  (14.64) |
| **36** | Gibbons R, Houte JV. Dental caries. Annu Rev Med. 1975; 26(1):121-136. | 269  (6.26) | 266  (6.19) | 18 | 0 | 359  (8.35) | 158  (3.67) |
| **37** | Vargas CM, Crall JJ, Schneider DA. Sociodemographic distribution of pediatric dental caries: NHANES III, 1988–1994. J Am Dent Assoc. 1998; 129(9):1229-1238. | 265  (13.25) | 260  (13.00) | 9 | 0 | 594  (29.70) | 327  (16.35) |
| **38** | Fejerskov O. Changing paradigms in concepts on dental caries: consequences for oral health care. Caries Res. 2004; 38(3):182-191. | 262  (18.71) | 229  (16.36) | 55 | 6 | 793  (56.64) | 303  (21.64) |
| **39** | Gibbons RJ, Banghart SB. Synthesis of extracellular dextran by cariogenic bacteria and its presence in human dental plaque. Arch Oral Biol. 1967; 12(1):11-23. | 259  (5.08) | 258  (5.06) | 6 | 0 | 319  (6.25) | 125  (2.45) |
| **40** | Axelsson P, Lindhe J, Nyström B. On the prevention of caries and periodontal disease: results of a 15‐year longitudinal study in adults. J Clin Periodontol. 1991; 18(3):182-189. | 255  (9.44) | 247  (21.64) | 24 | 3 | 553  (20.48) | 263  (9.74) |
| **41** | Axelsson P, Lindhe J. The effect of a preventive programme on dental plaque, gingivitis and caries in schoolchildren. Results after one and two years. J Clin Periodontol. 1974; 1(2):126-138. | 253  (5.75) | 248  (5.64) | 12 | 0 | 426  (9.68) | 222  (5.05) |
| **42** | Fried D, Xie J, Shafi S, Featherstone JD, Breunig T, Le CQ. Imaging caries lesions and lesion progression with polarization sensitive optical coherence tomography. J Biomed Opt. 2002; 7(4):618-628. | 252  (15.75) | 242  (15.13) | 29 | 1 | 491  (30.69) | 274  (17.13) |
| **43** | Ogaard B. Prevalence of white spot lesions in 19-near-olds: A study on untreated and orthodontically treated persons 5 years after treatment. Am J Orthod Dentofacial Orthop. 1989; 96(5):423-427. | 252  (8.69) | 235  (8.10) | 15 | 0 | 508  (17.52) | 248  (8.55) |
| **44** | Nyvad B, Machiulskiene V, Bælum V. Reliability of a new caries diagnostic system differentiating between active and inactive caries lesions. Caries Res. 1999; 33(4):252-260. | 250  (13.16) | 232  (12.21) | 14 | 0 | 529  (27.84) | 275  (14.47) |
| **45** | Sakanaka S, Kim M, Taniguchi M, Yamamoto T. Antibacterial substances in Japanese green tea extract against Streptococcus mutans, a cariogenic bacterium. Agric Biol Chem. 1989; 53(9):2307-2311. | 250  (8.62) | 240  (8.28) | 9 | 0 | 505  (17.41) | 271  (9.34) |
| **46** | Keyes PH. The infectious and transmissible nature of experimental dental caries: Findings and implications. Arch Oral Biol. 1960; 1(4):304-320. | 247  (4.26) | 242  (4.17) | 6 | 0 | 583  (10.05) | 160  (2.76) |
| **47** | Petersen PE, Lennon MA. Effective use of fluorides for the prevention of dental caries in the 21st century: the WHO approach. Community Dent Oral Epidemiol. 2004; 32(5):319-321. | 242  (17.29) | 224  (16.00) | 64 | 1 | 499  (35.64) | 210  (15.00) |
| **48** | Moreno EC, Kresak M, Zahradnik RT. Fluoridated hydroxyapatite solubility and caries formation. Nature. 1974; 247(5435):64-65. | 240  (5.45) | 236  (5.36) | 33 | 2 | 315  (7.16) | 234  (5.32) |
| **49** | Lussi A, Megert B, Longbottom C, Reich E, Francescut P. Clinical performance of a laser fluorescence device for detection of occlusal caries lesions. Eur J Oral Sci. 2001; 109(1):14-19. | 237  (13.94) | 225  (13.24) | 7 | 4 | 481  (28.29) | 260  (15.29) |
| **50** | Loesche WJ, Rowan J, Straffon LH, Loos PJ. Association of Streptococcus mutans with human dental decay. Infect Immun. 1975; 11(6):1252-1260. | 236  (5.49) | 232  (5.40) | 6 | 0 | 395  (9.19) | 187  (4.35) |
| **51** | Kuramitsu HK. Virulence factors of mutans streptococci: role of molecular genetics. Crit Rev Oral Biol Med. 1993; 4(2):159-176. | 234  (9.36) | 227  (9.08) | 12 | 0 | 354  (14.16) | 235  (9.40) |
| 52 | Mjör IA, Toffentti F. Secondary caries: A literature review with case reports. Quintessence Int. 2000; 31(3):165-179. | 230  (12.78) | 221  (12.28) | 37 | 5 | 426  (23.67) | 244  (13.56) |
| **53** | Moreno EC, Kresak M, Zahradnik RT. Physicochemical aspects of fluoride-apatite systems relevant to the study of dental caries. Caries Res. 1977; 11(1):142-171. | 230  (5.61) | 228  (5.56) | 13 | 1 | 287  (7.00) | 215  (5.24) |
| **54** | Nyvad B, Kilian M. Comparison of the initial streptococcal microflora on dental enamel in caries-active and in caries-inactive individuals. Caries Res. 1990; 24(4):267-272. | 229  (8.18) | 219  (7.82) | 16 | 0 | 355  (12.68) | 216  (7.71) |
| **55** | Chaussain-Miller C, Fioretti F, Goldberg M, Menashi S. The role of matrix metalloproteinases (MMPs) in human caries. J Dent Res. 2006; 85(1):22-32. | 223  (18.58) | 204  (17.00) | 25 | 1 | 388  (32.33) | 234  (19.50) |
| **56** | Aoki A, Ishikawa I, Yamada T, Otsuki M, Watanabe H, Tagami J, et al. Comparison between Er: YAG laser and conventional technique for root caries treatment in vitro. J Dent Res. 1988; 77(6):1404-1414. | 222  (11.10) | 213  (10.65) | 22 | 1 | 396  (19.80) | 243  (12.15) |
| **57** | Li Y, Caufield PW. The fidelity of initial acquisition of mutans streptococci by infants from their mothers. J Dent Res. 1995; 74(2):681-685. | 220  (9.57) | 202  (8.78) | 9 | 0 | 502  (21.83) | 246  (10.70) |
| **58** | Leme AFP, Koo H, Bellato CM, Bedi G, Cury JA. The role of sucrose in cariogenic dental biofilm formation—new insight. J Dent Res. 2006; 85(10):878-887. | 219  (18.25) | 211  (17.58) | 50 | 1 | 406  (33.83) | 241  (20.08) |
| **59** | Ekstrand KR, Ricketts DNJ, Kidd EAM. Reproducibility and accuracy of three methods for assessment of demineralization depth on the occlusal surface: an in vitro examination. Caries Res. 1997; 31(3):224-231. | 218  (10.38) | 204  (9.71) | 9 | 0 | 490  (23.33) | 245  (11.67) |
| **60** | Fejerskov O, Thylstrup A, Larsen MJ. Rational use of fluorides in caries prevention: a concept based on possible cariostatic mechanisms. Acta Odontol Scand. 1981; 39(4):241-249. | 214  (5.78) | 210  (5.68) | 17 | 1 | 369  (9.97) | 203  (5.49) |
| **61** | Kassebaum NJ, Bernabé E, Dahiya M, Bhandari B, Murray CJL, Marcenes W. Global burden of untreated caries: a systematic review and metaregression. J Dent Res. 2015; 94(5):650-658. | 212  (70.67) | 202  (67.33) | 84 | 12 | 399  (133.00) | 278  (92.67) |
| **62** | Ten Cate JM. Current concepts on the theories of the mechanism of action of fluoride. Acta Odontol Scand. 1999; 57(6):325-329. | 212  (11.16) | 203  (10.68) | 36 | 3 | 459  (24.16) | 255  (13.42) |
| **63** | Munson MA, Banerjee A, Watson TF, Wade WG. Molecular analysis of the microflora associated with dental caries. J Clin Microbiol. 2004; 42(7):3023-3029. | 211  (15.07) | 203  (14.50) | 28 | 5 | 351  (25.07) | 217  (15.50) |
| **64** | Bratthall D. Introducing the Significant Caries Index together with a proposal for a new global oral health goal for 12‐year‐olds. Int Dent J. 2000; 50(6):378-384. | 207  (11.50) | 179  (9.94) | 5 | 0 | 566  (31.44) | 218  (12.11) |
| **65** | Byun R, Nadkarni MA, Chhour KL, Martin FE, Jacques NA, Hunter N. Quantitative analysis of diverse Lactobacillus species present in advanced dental caries. J Clin Microbiol. 2004**;**  42(7):3128-3136. | 206  (14.71) | 189  (13.50) | 21 | 3 | 362  (25.86) | 206  (14.71) |
| **66** | Belda-Ferre P, Alcaraz LD, Cabrera-Rubio R, Romero H, Simon-Soro A, Pignatelli M, et al. The oral metagenome in health and disease. ISME J. 2012; 6(1):46-56. | 205  (34.17) | 182  (30.33) | 122 | 18 | 325  (54.17) | 219  (36.50) |
| **67** | Dreizen S, Brown LR, Daly TE, Drane JB. Prevention of xerostomia-related dental caries in irradiated cancer patients. J Dent Res. 1977; 56(2):99-104. | 201  (4.90) | 201  (4.90) | 13 | 0 | 325  (7.93) | 207  (5.05) |
| **68** | Shi XQ, Welander U, Angmar-Månsson B. Occlusal caries detection with kavo diagnodent and radiography: an in vitro comparison. Caries Res. 2000; 34(2):151-158. | 200  (11.11) | 190  (10.56) | 6 | 0 | 384  (21.33) | 230  (12.78) |
| **69** | Sheiham A. Dental caries affects body weight, growth and quality of life in pre-school children. Br Dent J**.** 2006; 201(10):625-626. | 199  (16.58) | 186  (15.50) | 12 | 1 | 453  (37.75) | 218  (18.17) |
| **70** | Alaluusua S, Renkonen OV. Streptococcus mutans establishment and dental caries experience in children from 2 to 4 years old. Eur J Oral Sci. 1983; 91(6):453-457. | 198  (5.66) | 191  (5.46) | 2 | 0 | 397  (11.34) | 83  (2.37) |
| **71** | Edwardsson S. Characteristics of caries-inducing human streptococci resembling Streptococcus mutans. Arch Oral Biol**.** 1968; 13(6):637-646. | 196  (3.92) | 196  (3.92) | 7 | 0 | 266  (5.32) | 110  (2.20) |
| **72** | Takahashi N, Nyvad B. Caries ecology revisited: microbial dynamics and the caries process. Caries Res**.** 2008; 42(6):409-418. | 193  (19.30) | 180  (18.00) | 35 | 4 | 439  (43.90) | 215  (21.50) |
| **73** | Svanberg M, Mjör IA, Orstavik, D. Mutans streptococci in plaque from margins of amalgam, composite, and glass-ionomer restorations. J Dent Res. 1990; 69(3):861-864. | 193  (6.89) | 187  (6.68) | 13 | 0 | 337  (12.04) | 201  (7.18) |
| **74** | Fusayama T. Two layers of carious dentin; diagnosis and treatment. Oper Dent. 1979; 4(2):63-70. | 192  (4.92) | 178  (4.56) | 9 | 0 | 374  (9.59) | 183  (4.69) |
| **75** | Hale KJ. Moral health risk assessment timing and establishment of the dental home. Pediatrics. 2003; 111(5):1113-1116. | 191  (12.73) | 183  (12.20) | 6 | 1 | 458  (30.53) | 213  (14.20) |
| **76** | Moynihan PJ, Kelly SAM. Effect on caries of restricting sugars intake: systematic review to inform WHO guidelines. J Dent Res. 2014; 93(1):8-18. | 190  (47.50) | 186  (46.50) | 100 | 13 | 419  (104.75) | 237  (59.25) |
| **77** | Ahola AJ, Yli-Knuuttila H, Suomalainen T, Poussa T, Ahlström A, Meurman JH, et al. Short-term consumption of probiotic-containing cheese and its effect on dental caries risk factors. Arch Oral Biol. 2002; 47(11):799-804. | 188  (11.75) | 173  (10.81) | 32 | 3 | 384  (24.00) | 202  (12.63) |
| **78** | Loesche WJ, Syed SA. The predominant cultivable flora of carious plaque and carious dentine. Caries Res. 1973; 7(3):201-216. | 188  (4.18) | 186  (4.13) | 4 | 0 | 238  (5.29) | 159  (3.53) |
| **79** | Zinner DD, Jablon JM, Aran AP, Saslaw MS. Experimental Caries Induced in Animals by Streptococci of Human Origin. Proc Soc Exp. 1965; Biol Med. 118(3):766-770. | 185  (3.49) | 185  (3.49) | 1 | 0 | 263  (4.96) | 93  (1.75) |
| **80** | Van Nieuw AA, Bolscher JGM, Veerman ECI. Salivary proteins: protective and diagnostic value in cariology?. Caries Res. 2004; 38(3):247-253. | 184  (13.14) | 167  (11.93) | 28 | 1 | 453  (32.36) | 246  (17.57) |
| **81** | Kleinberg I. A mixed-bacteria ecological approach to understanding the role of the oral bacteria in dental caries causation: an alternative to Streptococcus mutans and the specific-plaque hypothesis. Crit Rev Oral Biol Med. 2002; 13(2):108-125. | 183  (11.44) | 169  (10.56) | 33 | 4 | 400  (25.00) | 202  (12.63) |
| **82** | Cochrane NJ, Cai F, Huq NL, Burrow MF, Reynolds EC. New approaches to enhanced remineralization of tooth enamel. J Dent Res. 2010; 89(11):1187-1197. | 182  (22.75) | 169  (21.13) | 107 | 8 | 396  (49.50) | 217  (27.13) |
| **83** | Petersen PE. Sociobehavioural risk factors in dental caries–international perspectives. Community Dent Oral Epidemiol. 2005; 33(4):274-279. | 182  (14.00) | 166  (12.77) | 28 | 2 | 455  (35.00) | 195  (15.00) |
| **84** | Mouradian WE, Wehr E, Crall JJ. Disparities in children's oral health and access to dental care. JAMA. 2000; 284(20):2625-2631. | 180  (10.00) | 171  (9.50) | 44 | 1 | 433  (24.06) | 209  (11.61) |
| **85** | Beighton D. The complex oral microflora of high‐risk individuals and groups and its role in the caries process. Community Dent Oral Epidemiol**.** 2005; 33(4):248-255. | 179  (13.77) | 162  (12.46) | 12 | 2 | 368  (28.31) | 187  (14.38) |
| **86** | Yoshiyama M, Tay FR, Doi J, Nishitani Y, Yamada T, Itou K, et al. Bonding of self-etch and total-etch adhesives to carious dentin. J Dent Res.2002;81(8):556-560. | 179  (11.19) | 169  (10.56) | 11 | 1 | 318  (19.88) | 180  (11.25) |
| **87** | Shen P. Cai F, Nowicki A, Vincent J, Reynolds EC. Remineralization of enamel subsurface lesions by sugar-free chewing gum containing casein phosphopeptide-amorphous calcium phosphate. J Dent Res. 2001;80(12):2066-2070. | 179  (10.53) | 174  (10.24) | 23 | 7 | 430  (25.29) | 200  (11.76) |
| **88** | Lukacs JR, Largaespada LL. Explaining sex differences in dental caries prevalence: saliva, hormones, and “life‐history” etiologies. Am J Hum Biol. 2006;18(4):540-555. | 178  (14.83) | 166  (13.83) | 78 | 2 | 397  (33.08) | 202  (16.83) |
| **89** | Makinen KK, Bennett CA, Hujoel PP, Isokangas PJ, Isotupa KP, Pape Jr HR, et al. Xylitol chewing gums and caries rates: a 40-month cohort study. J Dent Res. 1995; 74(12):1904-1913. | 178  (7.74) | 172  (7.48) | 31 | 1 | 374  (16.26) | 198  (8.61) |
| **90** | Casamassimo PS, Thikkurissy S, Edelstein BL, Maiorini E. Beyond the dmft: the human and economic cost of early childhood caries. J Am Dent Assoc. 2009; 140(6):650-657. | 176  (19.56) | 172  (19.11) | 38 | 4 | 351  (39.00) | 202  (22.44) |
| **91** | Artun J, Brobakken BO. Prevalence of carious white spots after orthodontic treatment with multibonded appliances. Eur J Orthod. 1996; 8(4):229-234. | 176  (5.50) | 166  (5.19) | 5 | 1 | 373  (11.66) | 170  (5.31) |
| **92** | Michalek SM, Mestecky J, Arnold RR, Bozzo L. Ingestion of Streptococcus mutans induces secretory immunoglobulin A and caries immunity. Science. 1976; 192(4245):1238-1240. | 176  (4.19) | 175  (4.17) | 1 | 0 | 236  (5.62) | 94  (2.24) |
| **93** | Arends J, Christoffersen J. Invited review article: the nature of early caries lesions in enamel. J Dent Res. 1986; 65(1):2-11. | 175  (5.47) | 166  (5.19) | 15 | 1 | 214  (6.69) | 163  (5.09) |
| **94** | Burne RA, Marquis RE. Alkali production by oral bacteria and protection against dental caries. FEMS Microbiol Lett. 2000; 193(1):1-6. | 174  (9.67) | 166  (9.22) | 26 | 1 | 281  (15.61) | 180  (10.00) |
| **95** | Ikeda T, Sandham HJ, Bradley JREL. Changes in Streptococcus mutans and lactobacilli in plaque in relation to the initiation of dental caries in Negro children. Arch Oral Biol. 1973; 18(4):555-566. | 174  (3.87) | 172  (3.82) | 1 | 0 | 243  (5.40) | 124  (2.76) |
| **96** | Narvai PC, Frazao P, Roncalli AG, Antunes, JL. Dental caries in Brazil: decline, polarization, inequality and social exclusion. Rev Panam Salud Publica. 2006; 19(6):385-393. | 173  (14.42) | 126  (10.50) | 22 | 6 | 122  (10.17) | 156  (13.00) |
| **97** | Wen ZT, Burne RA. Functional genomics approach to identifying genes required for biofilm development by Streptococcus mutans. Appl. Environ. Microbiol. 2002; 68(3):1196-1203. | 172  (10.75) | 157  (9.81) | 18 | 0 | 262  (16.38) | 163  (10.19) |
| **98** | Senadheera MD, Guggenheim B, Spatafora GA, Huang YCC, Choi J, Hung, DC, et al. A VicRK signal transduction system in Streptococcus mutans affects gtfBCD, gbpB, and ftf expression, biofilm formation, and genetic competence development. J Bacteriol. 2005; 187(12): 4064-4076. | 171  (13.15) | 160  (12.31) | 19 | 1 | 220  (16.92) | 162  (12.46) |
| **99** | Zickert I, Emilson CG, Krasse B. Effect of caries preventive measures in children highly infected with the bacterium Streptococcus mutans. Arch Oral Biol. 1982; 27(10):861-868. | 171  (4.75) | 166  (4.61) | 8 | 0 | 287  (7.97) | 173  (4.81) |
| **100** | Otake S, Makimura M, Kuroki T, Nishihara Y, Hirasawa M. Anticaries effects of polyphenolic compounds from Japanese green tea. Caries Res. 1991; 25(6):438-443. | 168  (6.22) | 154  (5.70) | 15 | 0 | 368  (13.63) | 183  (6.78) |

Tab. 1. The top 100 most-cited papers in Cariology
